# Supplementary material for: Tsunami risk perception in Southern Italy: first evidence from a sample survey
Source: Copernicus journal article supplement (doi:10.5194/nhess-2019-97), 2019-04-15
Supplement: Supplementary file [file nhess-2019-97-AC1-supplement.pdf]

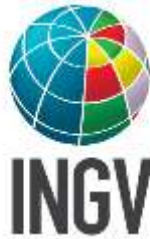

## **Survey on risk perception of tsunami of seismogenetic origin**

### **Presentation Formula**

Good Morning, good evening, on behalf of the National Institute of Geophysics and Volcanology, we are carrying out a research on a phenomenon called tsunami. If you agree to answer, I will ask you some questions on this issue. The information we are going to collect will allow both the National Institute of Geophysics and Volcanology and the other institutions of the Civil Protection System to better understand the this type of phenomena is perceived by the population and thus prepare the most appropriate interventions.

Please note that the information you provide will not be associated in any way with your name, but will be treated anonymously and statistically aggregated. The interview will last a maximum of 10 minutes. Thank you for your availability

### **SECTION 1: SOCIO-DEMOGRAPHIC DATA AND INFORMATION ON RESPONDENTS' BELONGING TERRITORY**

**Province**    |\_|\_|

**Municipality** \_\_\_\_\_

1) **Gender**     M     F     Not willing to declare it

2) **Age**          |\_|\_|

3) **Education**

- Elementary licence
- Middle school licence
- Diploma of completion of secondary education
- University Degree
- Master's degree, PhD, other post-lauream titles
- No qualification

4) **Nationality**

- Italian
- Non-Italian

5) **How is your family household composed?** (multiple responses allowed)

- I live alone
- With adult(s)
- With children under 6 years
- With children under 6 years
- With elders
- With disabled / reduced mobility persons

6) **How many kilometres far from the shore do you live?**

- Within 1 km
- From 1 to 3 km
- Over 3 km
- I don't know

7) **How many generations is your family living on this coastline?** (Even in different households in the same area)

- My family was here from before my great-grandparents
- My great-grandparents lived there
- My grandparents lived there
- My father or my mother lived there
- We are the first generation settled here

## **SECTION 2: LEVEL OF AWARENESS AND SOURCES OF KNOWLEDGE ABOUT TSUNAMI HAZARD**

8) **Have you ever heard about tsunamis?**

- Yes  No

(if not, go to question 14.)

9) **Can you tell me which words do you associate with tsunami?**

- Earthquake;  seaquake;  large wave;  port;  flooding;  rough sea;
- inundation;  sea withdrawal;  currents;  strong wind.

10) **Can you tell me which words do you associate with seaquake?**

- Earthquake;  seaquake;  large wave;  port;  flooding;  rough sea;
- inundation;  sea withdrawal;  currents;  strong wind.

11) **Can you tell me which word sound more familiar to you?**

- Tsunami  Seaquake

12) **If you already heard about tsunami, from which sources?** (multiple responses allowed)

- Books
- Newspapers
- Tv News
- Radio
- Internet
- Television programs / channels about science (SuperQuark, Focus, NatGeo etc.)
- Movies
- Civil Protection (#IoNonRischio – Maremoti, drills).
- Region, provinces or municipalities
- Research institutions / Universities
- Friends / relatives
- Other (specify)

\_\_\_\_\_ Other

13) **In the Mediterranean Sea the possibility of a tsunami / tidal wave is:**

|                          |                          |                                       |                          |                          |
|--------------------------|--------------------------|---------------------------------------|--------------------------|--------------------------|
| Not<br>probable          | Somewhat<br>improbable   | Neither<br>improbable<br>nor probable | Somewhat<br>probable     | Very<br>probable         |
| <input type="checkbox"/> | <input type="checkbox"/> | <input type="checkbox"/>              | <input type="checkbox"/> | <input type="checkbox"/> |

14) **In your opinion, what are the causes that may trigger a tsunami / seaquake?** (multiple responses allowed)

- Earthquakes
- Volcanic Eruptions
- Landslides
- Meteorites or asteroids at sea
- Weather phenomena
- Other (specify)

\_\_\_\_\_ Other

I don't know

### SECTION 3: CONTEXTUAL PERCEPTION OF TSUNAMI HAZARD

15) **The coast of your municipality are mainly**

- |                                              |                                                 |
|----------------------------------------------|-------------------------------------------------|
| <input type="checkbox"/> Low and sandy       | <input type="checkbox"/> High and sandy         |
| <input type="checkbox"/> Low and rocky       | <input type="checkbox"/> High and rocky         |
| <input type="checkbox"/> With inlets / coves | <input type="checkbox"/> Without inlets / coves |

16) **Do you think that the coasts of your municipality / province can be affected by a tsunami / seaquake?**

- Yes    No    I don't know

17) **In your opinion, which areas of the Mediterranean are more likely to be hit by tsunami / seaquake? (multiple responses allowed)**

|                                                                                                                                  |                          |
|----------------------------------------------------------------------------------------------------------------------------------|--------------------------|
| My own region or closer ones (Molise, Puglia, Calabria, Calabria, Sicily, Campania, Lower Tyrrhenian Sea, Gulf of Taranto)       | <input type="checkbox"/> |
| Western Mediterranean (Spain, Morocco, Algeria)                                                                                  | <input type="checkbox"/> |
| Central Mediterranean (Italy, France, Slovenia, Croatia, Montenegro, Bosnia Herzegovina, Albania, Greece, Tunisia, Malta, Libya) | <input type="checkbox"/> |
| Eastern Mediterranean (Coast Egypt, Israel, Lebanon, Syria, Turkey and Cyprus)?                                                  | <input type="checkbox"/> |
| I don't know                                                                                                                     | <input type="checkbox"/> |

18) **If a tsunami / seaquake would hit your region, how much do you think the water level could rise with respect to the normal sea level?**

- Less than 50 cm
- Between 50 cm and 1 meter
- Between 1 meter and 3 meters
- Over 3 meters
- I don't know

19) **If a tsunami / seaquake would hit your region, how far from the shore could the water arrive?**

- Less than 1 meter
- From 1 to 10 meters
- From 10 to 99 meters
- From hundred meters to kilometers
- I don't know

20) **In your opinion, in case of tsunami / tsunami, to be dangerous for people near the shore how much should the water level with respect to the normal sea level?**

- Less than 50 cm
- Between 50 cm and 1 meter
- Between 1 meter and 3 meters
- Over 3 meters
- I don't know

21) **What kind of phenomena may precede the arrival of a tsunami / seaquake?**  
(How far do you agree with the following statements?)

A strong or long-lasting earthquake

|                                               |                                               |                                                        |                                            |                                            |
|-----------------------------------------------|-----------------------------------------------|--------------------------------------------------------|--------------------------------------------|--------------------------------------------|
| Strongly disagree<br><input type="checkbox"/> | Somewhat disagree<br><input type="checkbox"/> | Neither agree nor disagree<br><input type="checkbox"/> | Somewhat agree<br><input type="checkbox"/> | Strongly Agree<br><input type="checkbox"/> |
|-----------------------------------------------|-----------------------------------------------|--------------------------------------------------------|--------------------------------------------|--------------------------------------------|

Sea withdrawal

|                                               |                                               |                                                        |                                            |                                            |
|-----------------------------------------------|-----------------------------------------------|--------------------------------------------------------|--------------------------------------------|--------------------------------------------|
| Strongly disagree<br><input type="checkbox"/> | Somewhat disagree<br><input type="checkbox"/> | Neither agree nor disagree<br><input type="checkbox"/> | Somewhat agree<br><input type="checkbox"/> | Strongly Agree<br><input type="checkbox"/> |
|-----------------------------------------------|-----------------------------------------------|--------------------------------------------------------|--------------------------------------------|--------------------------------------------|

Sea level rise

|                                               |                                               |                                                        |                                            |                                            |
|-----------------------------------------------|-----------------------------------------------|--------------------------------------------------------|--------------------------------------------|--------------------------------------------|
| Strongly disagree<br><input type="checkbox"/> | Somewhat disagree<br><input type="checkbox"/> | Neither agree nor disagree<br><input type="checkbox"/> | Somewhat agree<br><input type="checkbox"/> | Strongly Agree<br><input type="checkbox"/> |
|-----------------------------------------------|-----------------------------------------------|--------------------------------------------------------|--------------------------------------------|--------------------------------------------|

Strong sea currents

|                                               |                                               |                                                        |                                            |                                            |
|-----------------------------------------------|-----------------------------------------------|--------------------------------------------------------|--------------------------------------------|--------------------------------------------|
| Strongly disagree<br><input type="checkbox"/> | Somewhat disagree<br><input type="checkbox"/> | Neither agree nor disagree<br><input type="checkbox"/> | Somewhat agree<br><input type="checkbox"/> | Strongly Agree<br><input type="checkbox"/> |
|-----------------------------------------------|-----------------------------------------------|--------------------------------------------------------|--------------------------------------------|--------------------------------------------|

A strong and long-lasting uproar

|                                               |                                               |                                                        |                                            |                                            |
|-----------------------------------------------|-----------------------------------------------|--------------------------------------------------------|--------------------------------------------|--------------------------------------------|
| Strongly disagree<br><input type="checkbox"/> | Somewhat disagree<br><input type="checkbox"/> | Neither agree nor disagree<br><input type="checkbox"/> | Somewhat agree<br><input type="checkbox"/> | Strongly Agree<br><input type="checkbox"/> |
|-----------------------------------------------|-----------------------------------------------|--------------------------------------------------------|--------------------------------------------|--------------------------------------------|

22) **Try to figure out the effects of a tsunami / tsunami on the coasts of your region. How far do you agree with the following statements?**

Deaths or serious injuries

|                                               |                                               |                                                        |                                            |                                            |
|-----------------------------------------------|-----------------------------------------------|--------------------------------------------------------|--------------------------------------------|--------------------------------------------|
| Strongly disagree<br><input type="checkbox"/> | Somewhat disagree<br><input type="checkbox"/> | Neither agree nor disagree<br><input type="checkbox"/> | Somewhat agree<br><input type="checkbox"/> | Strongly Agree<br><input type="checkbox"/> |
|-----------------------------------------------|-----------------------------------------------|--------------------------------------------------------|--------------------------------------------|--------------------------------------------|

Damage / destruction of households, buildings or infrastructures

|                                               |                                               |                                                        |                                            |                                            |
|-----------------------------------------------|-----------------------------------------------|--------------------------------------------------------|--------------------------------------------|--------------------------------------------|
| Strongly disagree<br><input type="checkbox"/> | Somewhat disagree<br><input type="checkbox"/> | Neither agree nor disagree<br><input type="checkbox"/> | Somewhat agree<br><input type="checkbox"/> | Strongly Agree<br><input type="checkbox"/> |
|-----------------------------------------------|-----------------------------------------------|--------------------------------------------------------|--------------------------------------------|--------------------------------------------|

Impacts on natural environment (changes in coastal landscape, impacts on vegetation, crops, wild animals and livestock, etc.)

|                                               |                                               |                                                        |                                            |                                            |
|-----------------------------------------------|-----------------------------------------------|--------------------------------------------------------|--------------------------------------------|--------------------------------------------|
| Strongly disagree<br><input type="checkbox"/> | Somewhat disagree<br><input type="checkbox"/> | Neither agree nor disagree<br><input type="checkbox"/> | Somewhat agree<br><input type="checkbox"/> | Strongly Agree<br><input type="checkbox"/> |
|-----------------------------------------------|-----------------------------------------------|--------------------------------------------------------|--------------------------------------------|--------------------------------------------|

Impacts on the economy and work (destruction of coastal enterprises, damages to tourism industry, scarcity of financial resources, etc.)

|                                               |                                               |                                                        |                                            |                                            |
|-----------------------------------------------|-----------------------------------------------|--------------------------------------------------------|--------------------------------------------|--------------------------------------------|
| Strongly disagree<br><input type="checkbox"/> | Somewhat disagree<br><input type="checkbox"/> | Neither agree nor disagree<br><input type="checkbox"/> | Somewhat agree<br><input type="checkbox"/> | Strongly Agree<br><input type="checkbox"/> |
|-----------------------------------------------|-----------------------------------------------|--------------------------------------------------------|--------------------------------------------|--------------------------------------------|

#### SECTION 4: REPRESENTATION OF TSUNAMIS

23) How far do you agree with the following statements?

When you feel a strong earthquake near the coast one should flee to the beach

|                                               |                                               |                                                        |                                            |                                            |
|-----------------------------------------------|-----------------------------------------------|--------------------------------------------------------|--------------------------------------------|--------------------------------------------|
| Strongly disagree<br><input type="checkbox"/> | Somewhat disagree<br><input type="checkbox"/> | Neither agree nor disagree<br><input type="checkbox"/> | Somewhat agree<br><input type="checkbox"/> | Strongly Agree<br><input type="checkbox"/> |
|-----------------------------------------------|-----------------------------------------------|--------------------------------------------------------|--------------------------------------------|--------------------------------------------|

A tsunami waves can flood the coastal inlands for kilometers

|                                               |                                               |                                                        |                                            |                                            |
|-----------------------------------------------|-----------------------------------------------|--------------------------------------------------------|--------------------------------------------|--------------------------------------------|
| Strongly disagree<br><input type="checkbox"/> | Somewhat disagree<br><input type="checkbox"/> | Neither agree nor disagree<br><input type="checkbox"/> | Somewhat agree<br><input type="checkbox"/> | Strongly Agree<br><input type="checkbox"/> |
|-----------------------------------------------|-----------------------------------------------|--------------------------------------------------------|--------------------------------------------|--------------------------------------------|

A half-metre tsunami wave can drag an adult man into the sea

|                                               |                                               |                                                        |                                            |                                            |
|-----------------------------------------------|-----------------------------------------------|--------------------------------------------------------|--------------------------------------------|--------------------------------------------|
| Strongly disagree<br><input type="checkbox"/> | Somewhat disagree<br><input type="checkbox"/> | Neither agree nor disagree<br><input type="checkbox"/> | Somewhat agree<br><input type="checkbox"/> | Strongly Agree<br><input type="checkbox"/> |
|-----------------------------------------------|-----------------------------------------------|--------------------------------------------------------|--------------------------------------------|--------------------------------------------|

Sometimes tsunamis can be preceded by sea withdrawal, even for several tens of metres.

|                                               |                                               |                                                        |                                            |                                            |
|-----------------------------------------------|-----------------------------------------------|--------------------------------------------------------|--------------------------------------------|--------------------------------------------|
| Strongly disagree<br><input type="checkbox"/> | Somewhat disagree<br><input type="checkbox"/> | Neither agree nor disagree<br><input type="checkbox"/> | Somewhat agree<br><input type="checkbox"/> | Strongly Agree<br><input type="checkbox"/> |
|-----------------------------------------------|-----------------------------------------------|--------------------------------------------------------|--------------------------------------------|--------------------------------------------|

In the Mediterranean sea tsunami with waves higher than twenty meters are possible

|                                               |                                               |                                                        |                                            |                                            |
|-----------------------------------------------|-----------------------------------------------|--------------------------------------------------------|--------------------------------------------|--------------------------------------------|
| Strongly disagree<br><input type="checkbox"/> | Somewhat disagree<br><input type="checkbox"/> | Neither agree nor disagree<br><input type="checkbox"/> | Somewhat agree<br><input type="checkbox"/> | Strongly Agree<br><input type="checkbox"/> |
|-----------------------------------------------|-----------------------------------------------|--------------------------------------------------------|--------------------------------------------|--------------------------------------------|

## SECTION 5: CULTURAL ATTITUDES AND WORLDVISION

24) How far do you agree with the following statements?

To move on in life you have to work hard and do what you are told to do

|                                               |                                               |                                                        |                                            |                                            |
|-----------------------------------------------|-----------------------------------------------|--------------------------------------------------------|--------------------------------------------|--------------------------------------------|
| Strongly disagree<br><input type="checkbox"/> | Somewhat disagree<br><input type="checkbox"/> | Neither agree nor disagree<br><input type="checkbox"/> | Somewhat agree<br><input type="checkbox"/> | Strongly Agree<br><input type="checkbox"/> |
|-----------------------------------------------|-----------------------------------------------|--------------------------------------------------------|--------------------------------------------|--------------------------------------------|

When a natural disaster occurs, authorities should impose severe and immediate punishment on those who break the rules

|                                               |                                               |                                                        |                                            |                                            |
|-----------------------------------------------|-----------------------------------------------|--------------------------------------------------------|--------------------------------------------|--------------------------------------------|
| Strongly disagree<br><input type="checkbox"/> | Somewhat disagree<br><input type="checkbox"/> | Neither agree nor disagree<br><input type="checkbox"/> | Somewhat agree<br><input type="checkbox"/> | Strongly Agree<br><input type="checkbox"/> |
|-----------------------------------------------|-----------------------------------------------|--------------------------------------------------------|--------------------------------------------|--------------------------------------------|

The healthiest society is the one based on competition between individuals

|                                               |                                               |                                                        |                                            |                                            |
|-----------------------------------------------|-----------------------------------------------|--------------------------------------------------------|--------------------------------------------|--------------------------------------------|
| Strongly disagree<br><input type="checkbox"/> | Somewhat disagree<br><input type="checkbox"/> | Neither agree nor disagree<br><input type="checkbox"/> | Somewhat agree<br><input type="checkbox"/> | Strongly Agree<br><input type="checkbox"/> |
|-----------------------------------------------|-----------------------------------------------|--------------------------------------------------------|--------------------------------------------|--------------------------------------------|

To deal with natural disasters individuals should prepare themselves before instead of waiting for someone to help them after

|                                               |                                               |                                                        |                                            |                                            |
|-----------------------------------------------|-----------------------------------------------|--------------------------------------------------------|--------------------------------------------|--------------------------------------------|
| Strongly disagree<br><input type="checkbox"/> | Somewhat disagree<br><input type="checkbox"/> | Neither agree nor disagree<br><input type="checkbox"/> | Somewhat agree<br><input type="checkbox"/> | Strongly Agree<br><input type="checkbox"/> |
|-----------------------------------------------|-----------------------------------------------|--------------------------------------------------------|--------------------------------------------|--------------------------------------------|

Many conflicts could be resolved by a fairer division of workload and natural resources

|                                               |                                               |                                                        |                                            |                                            |
|-----------------------------------------------|-----------------------------------------------|--------------------------------------------------------|--------------------------------------------|--------------------------------------------|
| Strongly disagree<br><input type="checkbox"/> | Somewhat disagree<br><input type="checkbox"/> | Neither agree nor disagree<br><input type="checkbox"/> | Somewhat agree<br><input type="checkbox"/> | Strongly Agree<br><input type="checkbox"/> |
|-----------------------------------------------|-----------------------------------------------|--------------------------------------------------------|--------------------------------------------|--------------------------------------------|

Natural disasters do not exist: it is only nature offended by man's arrogance and greediness, that rebels

|                                               |                                               |                                                        |                                            |                                            |
|-----------------------------------------------|-----------------------------------------------|--------------------------------------------------------|--------------------------------------------|--------------------------------------------|
| Strongly disagree<br><input type="checkbox"/> | Somewhat disagree<br><input type="checkbox"/> | Neither agree nor disagree<br><input type="checkbox"/> | Somewhat agree<br><input type="checkbox"/> | Strongly Agree<br><input type="checkbox"/> |
|-----------------------------------------------|-----------------------------------------------|--------------------------------------------------------|--------------------------------------------|--------------------------------------------|

When you do something for others you should not expect gratefulness

|                                               |                                               |                                                        |                                            |                                            |
|-----------------------------------------------|-----------------------------------------------|--------------------------------------------------------|--------------------------------------------|--------------------------------------------|
| Strongly disagree<br><input type="checkbox"/> | Somewhat disagree<br><input type="checkbox"/> | Neither agree nor disagree<br><input type="checkbox"/> | Somewhat agree<br><input type="checkbox"/> | Strongly Agree<br><input type="checkbox"/> |
|-----------------------------------------------|-----------------------------------------------|--------------------------------------------------------|--------------------------------------------|--------------------------------------------|

Natural disasters serve to remind us that making plans is useless: our lives are determined by forces that we cannot control

|                                               |                                               |                                                        |                                            |                                            |
|-----------------------------------------------|-----------------------------------------------|--------------------------------------------------------|--------------------------------------------|--------------------------------------------|
| Strongly disagree<br><input type="checkbox"/> | Somewhat disagree<br><input type="checkbox"/> | Neither agree nor disagree<br><input type="checkbox"/> | Somewhat agree<br><input type="checkbox"/> | Strongly Agree<br><input type="checkbox"/> |
|-----------------------------------------------|-----------------------------------------------|--------------------------------------------------------|--------------------------------------------|--------------------------------------------|

### SECTION 6: MESSAGES AND CHANNELS TO SPREAD TSUNAMI ALERT

25) **In your opinion, is it possible to spread an early warning before the arrival of a tsunami on the way to the coast?**

Yes       No       I don't know (If answer is "not" or "I don't know" go to 25)

26) **In your opinion, who should warn population about the impending arrival of a tsunami on the way to the coast?**

1. \_\_\_\_\_
2. \_\_\_\_\_
3. \_\_\_\_\_

27) **If a tsunami would hit your region's coastline, which channels would you prefer to receive an early warning? (max three answers)**

|                                                                         |
|-------------------------------------------------------------------------|
| <input type="checkbox"/> Television                                     |
| <input type="checkbox"/> Radio                                          |
| <input type="checkbox"/> Internet and social media                      |
| <input type="checkbox"/> E-mail                                         |
| <input type="checkbox"/> Phone call (mobile or fixed telephone)         |
| <input type="checkbox"/> Be advised by friends, neighbours or relatives |
| <input type="checkbox"/> SMS                                            |
| <input type="checkbox"/> Smartphone application from official sources   |
| <input type="checkbox"/> Sirens or other acoustic devices               |
